# Supplementary material
Source: publisher site journal article supplement (https://www.dovepress.com/article/541354)
Supplement: Supplementary file 1 [file 541354%20Revised%20Supplementary%20Table.docx]

Table S1 Baseline opioid regimen and MEQ/day in controls and long-term opioid use group

| Patient identifier | Indication | Opioid Rx | Daily OME | Baseline pain Burden (NRS) |
| --- | --- | --- | --- | --- |
| 2 | Chronic pain | Percocet 5mg 1x-2x daily x3 months | 15 | 7 |
| 3 | Chronic pain | Morphine ER 15mg qd, Morphine ER 30mg BID, Vicodine 7.5mg BID | 90 | 5 |
| 4 | Chronic pain | Percocet 5mg q6h | 30 | 9 |
| 5 | Chronic pain | Norco 5mg QID | 20 | 2 |
| 10 | Chronic pain | Oxycodone 5mg BID | 15 | 7 |
| 15 | Chronic pain | oxycontin 20mg daily | 30 | 6 |
| 17 | Chronic pain | Noco 10mg daily | 10 | 5 |
| 19 | Chronic pain | Percocet 5mg TID, Methadone 10mg TID | 112.5 | 4 |
| 20 | Chronic pain | Codeine 30mg BID | 9 | 10 |
| 21 | Chronic pain | Norco 7.5mg QID | 30 | 4 |
| 22 | Chronic pain | Norco 10mg Q4h | 60 | 4 |
| 23 | Chronic pain | Vicodin 7.5mg TID | 22.5 | 8 |
| 26 | Chronic pain | Oxycodone 5mg QID | 30 | 3 |
| 27 | Chronic pain | Norco 7.5mg QID | 30 | 6 |
| 28 | Chronic back pain | Norco 7.5mg QID | 30 | 8 |
| 29 | Chronic pain | Oxycodone 2-6mg daily | 9 | 10 |
| 30 | Chronic pain | oxycodone 5mg daily, Percocet | 7.5 | 4 |
| 31 | Chronic pain | Norco 7.5mg TID | 22.5 | 4 |
| 32 | Fibromyalgia | Oxycodone 5mg-7.5mg daily | 7.5 | 6 |
| 36 | Chronic pain | Norco 5mg TID-QID | 15 | 5 |
| 37 | Chronic pain | Tramadol 50mg TID | 15 | 8 |
| 42 | Chronic pain | vicodin 7.5mg TID | 22.5 | 3 |
| 47 | Chronic pain | Tramadol 50mg QID | 20 | 5 |

Abbreviations: Pt ID, patient identifier; Opioid Rx, opioid prescription; Daily OME, daily oral morphine equivalent (mg); Pain NRS, baseline pain burden measured by numeric rating scale; ER, extended release; qd, once daily; BID, twice daily; TID, three times daily; QID, four times daily; qXh, every X hours
